# Supplementary material for: Cationic rare-earth-metal methyl complexes: a new preparative access exemplified for Y and Pr
Source: Royal Society of Chemistry journal article supplement (doi:10.1039/c002252g), 2010-01-01
Supplement: c002252g.pdf [file c002252g.pdf]

## Supplementary Material:

### Cationic rare-earth-metal methyl complexes: a new preparative access

Anja Nieland, Andreas Mix, Beate Neumann, Hans-Georg Stammler and Norbert W. Mitzel\*

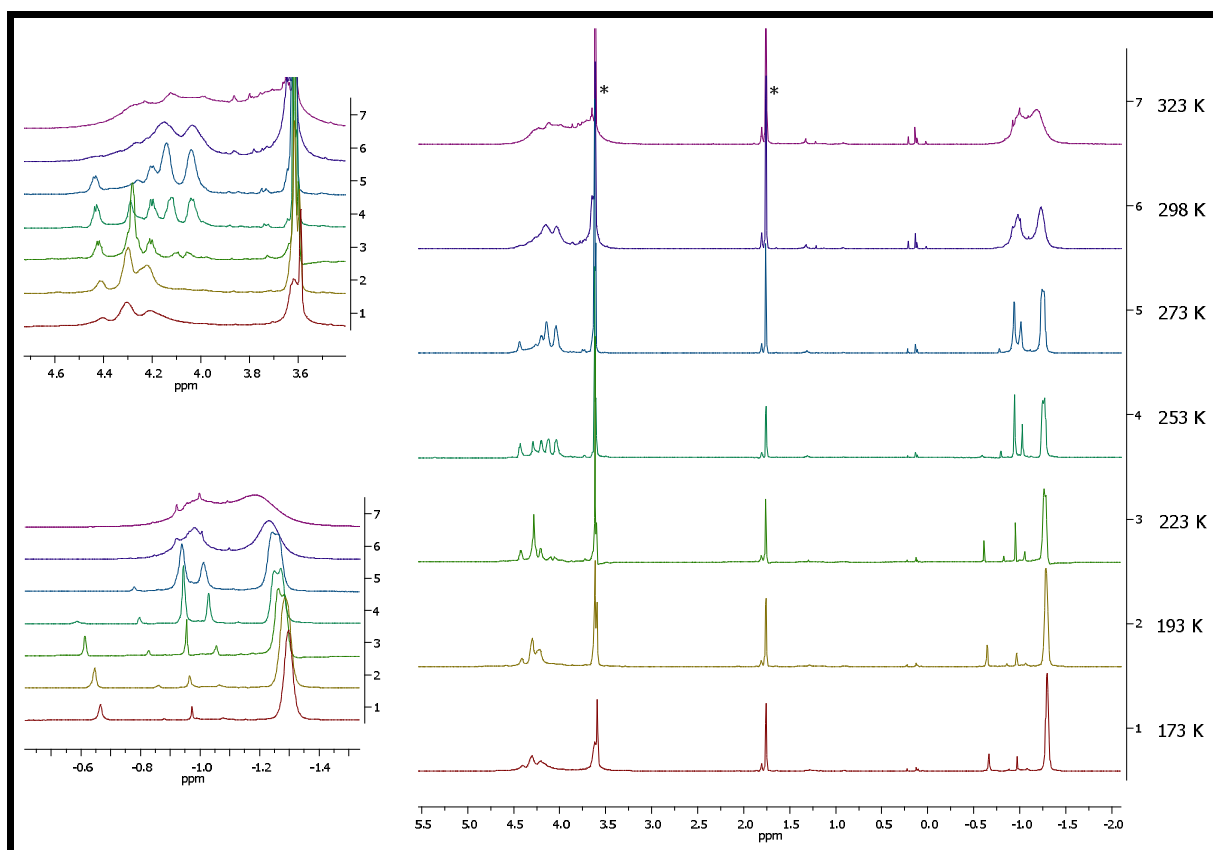

**Figure S1:**  $^1\text{H}$  NMR Spectrum of **1** in  $[\text{D}_8]\text{thf}$  at variable temperatures. Signals marked with an \* are residual signals of the solvent.

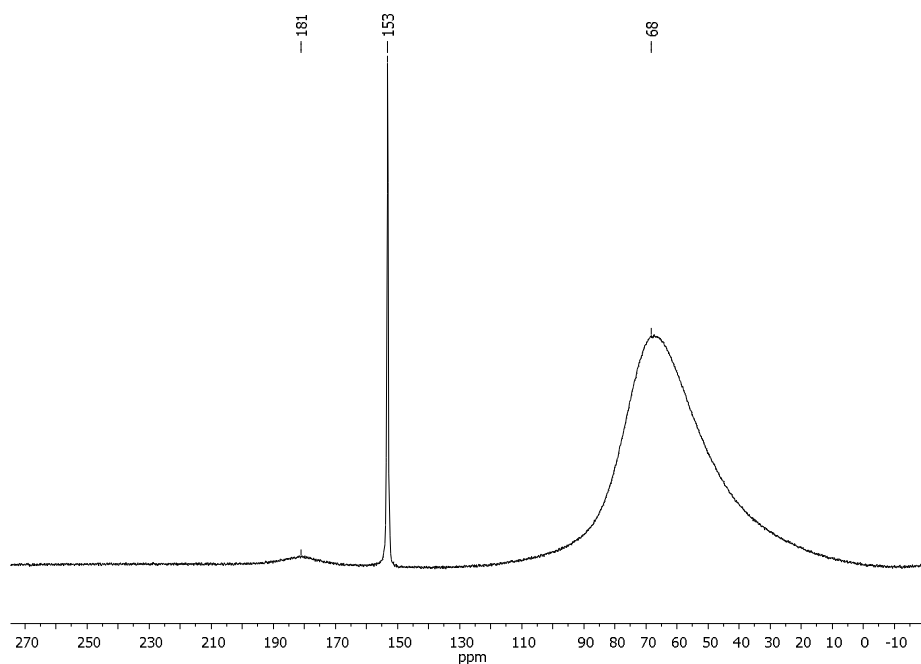

**Figure S2:**  $^{27}\text{Al}$  NMR Spectrum of **1** at 298 K.

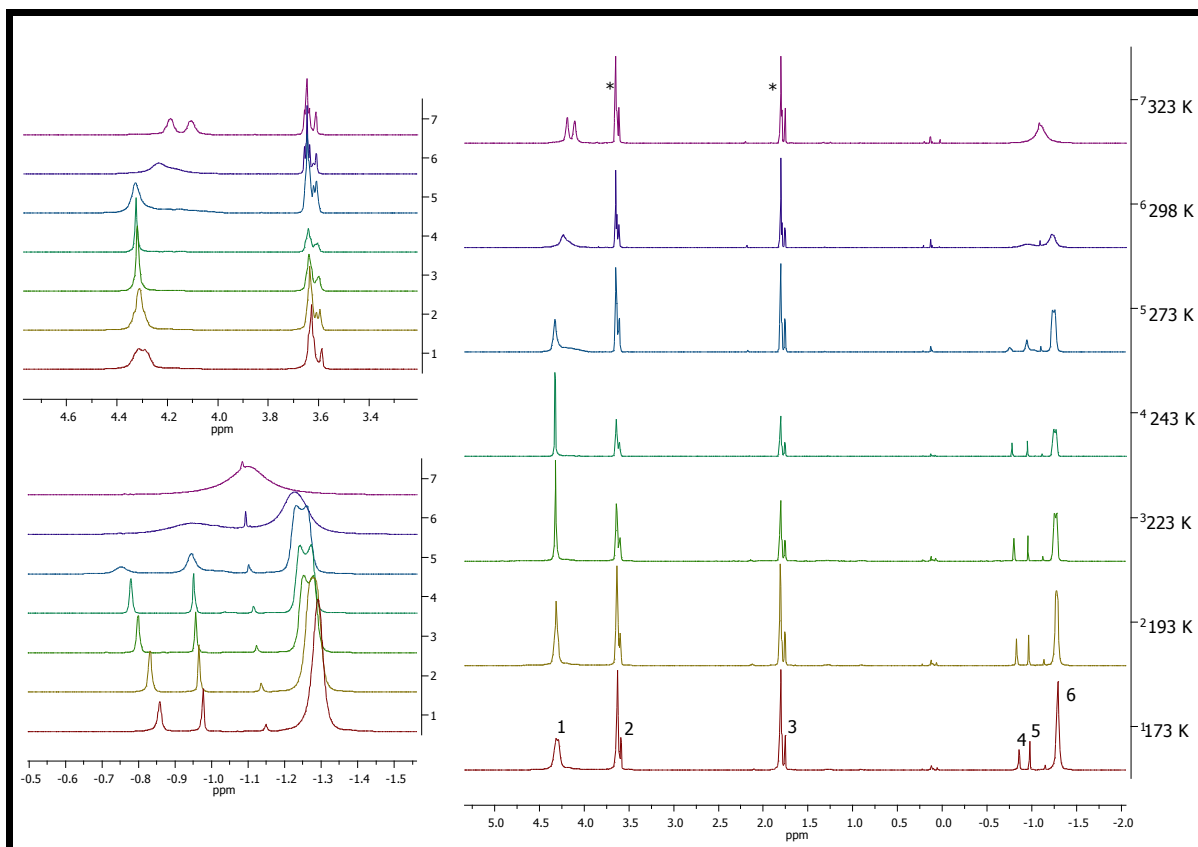

**Figure S3:**  $^1\text{H}$  NMR Spectrum of **3** in  $[\text{D}_8]\text{thf}$  at variable temperatures. Signals marked with an \* are residual signals of the solvent.

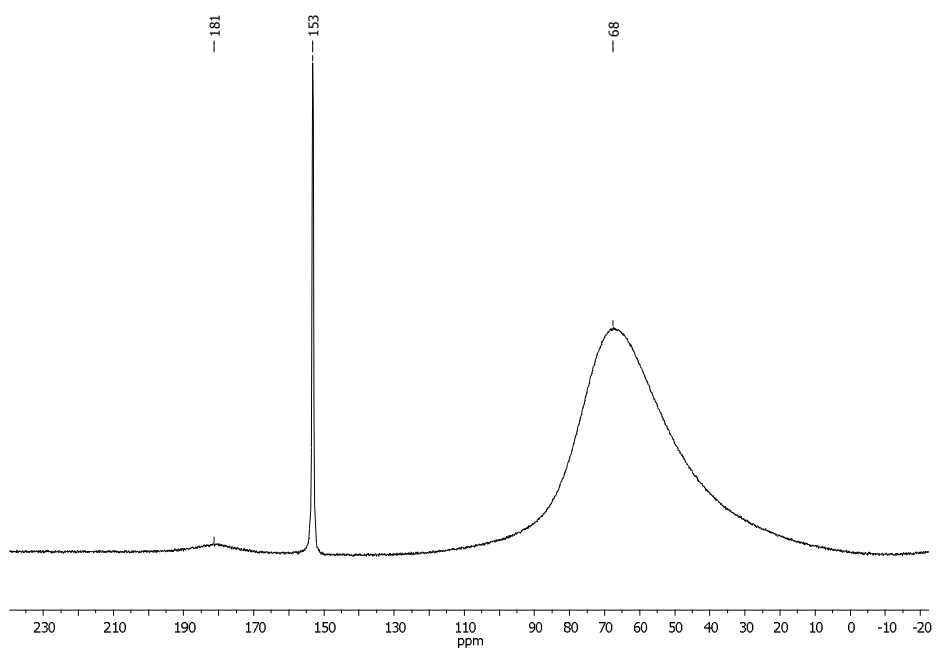

**Figure S4:**  $^{27}\text{Al}$  NMR Spectrum of **3** at 298 K.

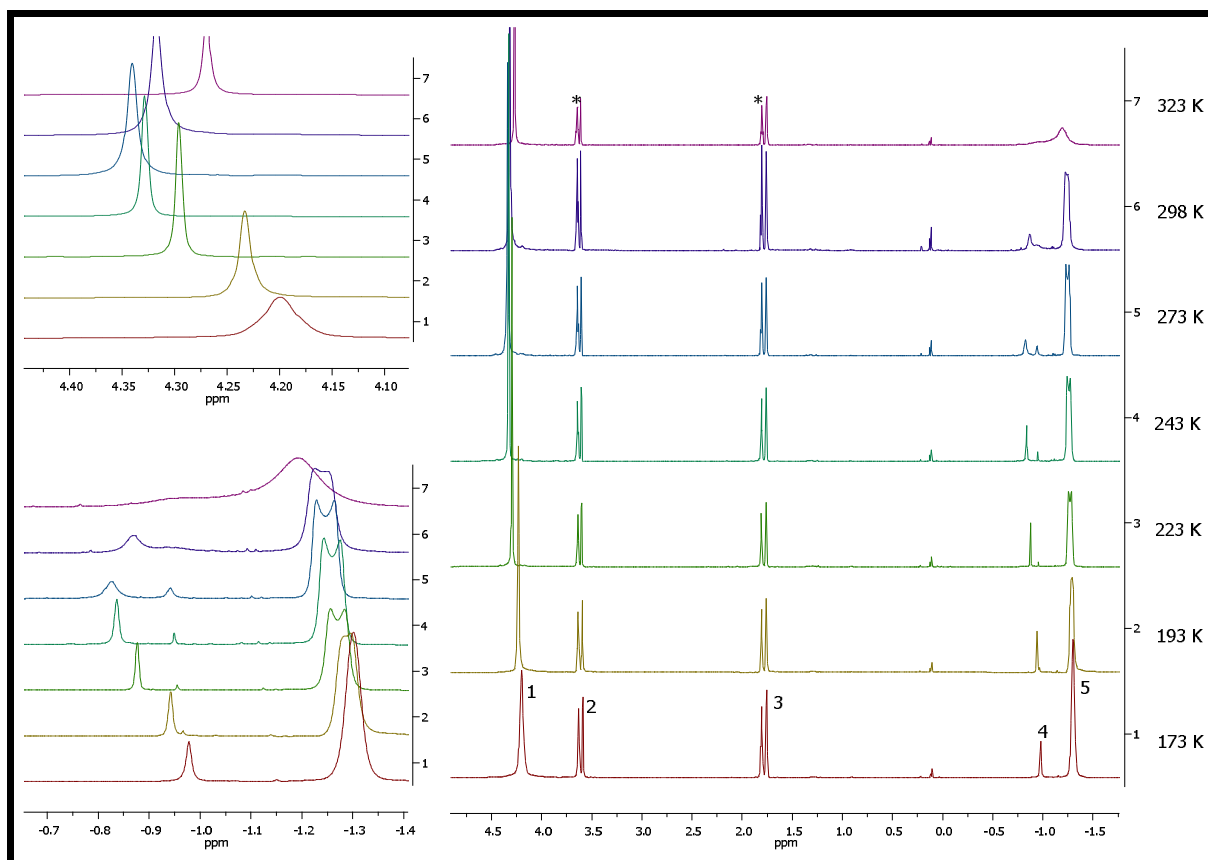

**Figure S3:**  $^1\text{H}$  NMR Spectrum of **5** in  $[\text{D}_8]\text{thf}$  at variable temperatures. Signals marked with an \* are residual signals of the solvent.
